# Supplementary material for: Speed Control of PMDC Motor based on Online Neural-PID Controller
Source: Research Square preprint supplement (doi:10.21203/rs.3.rs-6383325/v1), 2025-04-08
Supplement: Supplementary file 1 [file 020b8e39ac851c24aea3d864.docx]

**Speed Control of PMDC Motor based on Online Neural-PID Controller**

Husam Jawad Ali, Dr. Diyah Kammel Shary, Bayadir A. Issa

*EETRG, Dept. of Electrical Engineering Techniques, Basrah Engineering Technical College,*

*Southern Technical University*

*Corresponding Author:* [*hussam.jawad@stu.edu.iq*](mailto:hussam.jawad@stu.edu.iq)

*[[1]](#footnote-1)Abstract*— In terms of torque and speed capabilities, PMDC motors exhibit exceptional performance at cost of some load-related disturbances like the presence of high-power ripples and the nonlinear nature of the magnetic circuit. However, conventional linear controllers may be inadequate for superior performance. Therefore, modern neural PID controllers are used as the basis for developing an intelligent online closed-loop speed control to achieve the best motor operating characteristics. In this paper, a PID controller is designed for efficient PMDC motor speed control compared with the existing DC motor speed methods. Furthermore, the initial controller parameters are modified based on neural network optimization techniques to achieved the fastest speed. This will have a potential impact on the industrial applications of the PMDC motors.

*Index Terms*— Artificial Neural Networks, Controller (PID) Permanent Magnet DC Motor, Speed Control.

# Introduction

The direct applicability of model-based optimization and control of complex systems to multivariable systems makes it of great importance. This paper focuses on the performance of conventional control of permanent magnet direct current (PMDC) motors based on online neural network optimization [1].A self-tuning PID controller was employed due to the challenge of precisely adjusting the PI parameters without a thorough understanding of the behavior of the system that has to be controlled and, consequently, a good mathematical model of the system [2].When servo Permanent Magnet DC (PMDC) devices are subject to significant external disturbances and modeling parameter uncertainty, their overall performance might be seriously compromised. The accuracy and precision of position control decrease when the shaft of the PMDC machine is subjected to strong and sudden external disturbances. This affects the motor's ability to regulate the speed, and the control scheme takes longer to achieve the desired regulation with minimal error. Using traditional control algorithms, such as the PID method, will cause large errors that cannot be eliminated immediately in applications where the PMDC machine is subjected to intermittent external impulsive disturbances. This phenomenon undermines the performance of the feedback system [3]. The set of mathematical formulas that characterize the dynamic behavior of a system is known as system modeling. This is the primary consideration in selecting a suitable controller to meet a given requirement. A model for motor speed control is defined and designed. A proportional-integral-derivative (PID) controller is also considered in this work [4].Understanding the relationship between parameters and environmental factors is essential to solving the difficult problem of parameter estimation using empirical techniques. Setting up the experiment to determine the controller parameters, collecting data, etc. requires a lot of time and money when estimating parameters using the trial and error method. Due to the computing power of personal computers, optimization techniques have recently drawn attention to determining the system parameters. To estimate the controller parameters for different types of engines, researchers have developed adaptive search methods, particle swarm optimization, evolutionary algorithms, and more. One advantage of biologically influenced optimization methods is their ability to find the global optimum through the objective function fitting process. Therefore, biologically influenced optimization methods are preferred [5]. Adjusting the parameters of a PID controller using traditional methods can be challenging, particularly when striving for optimal torque and speed regulation in PMDC motors. To address this, modern intelligent technologies have become essential for fine-tuning PID controllers effectively. Common performance metrics used in this process include the absolute integral error, integral square error, and the total error of the absolute integral time.

In many real-world control scenarios, the PID controller stands out as the most fundamental and efficient control mechanism. Its versatility allows it to manage both steady-state and transient-state conditions, ensuring stability and adaptability to temporary feedback changes. Despite its simplicity and effectiveness, PID controllers can face performance issues when subjected to load-induced disturbances, which can lead to delayed responses. Overall, enhancing the gain parameters of a PID controller remains a complex challenge [6]. The primary challenge in this study is to determine the optimal PID controller parameters that yield the most accurate results for speed tracking and achieving the desired speed by controlling the voltage at the controller's output. Given that the motor model is nonlinear, the simplicity of PID control alone is insufficient for managing the motor speed. To address this issue, a real-time (online) speed control neural network was employed to extract the PID controller parameters. This approach enabled effective and efficient voltage control at the controller’s output, ensuring proper motor speed regulation.

# Mathematical Model of PMDC Motor.

It is possible to model a DC motor with a permanent magnet using two equivalent circuits: mechanical and electrical as shown in Figure 1.


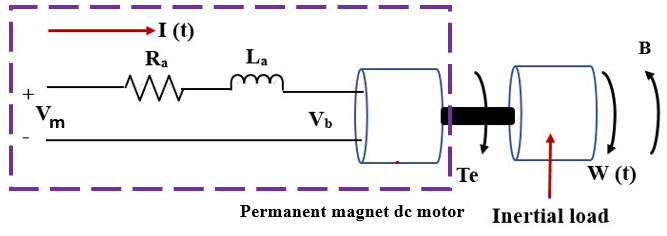


Figure 1. Equivalent Circuit of Permanent-Magnet DC Motor [7].

For Electrical Part, from Kirchhoff’s voltage law that [7, 8]:

(1)

| The motor voltage is represented by 𝑉 𝑚, 𝑉𝑅 = 𝑅𝑎𝑖𝑎 (t),  and 𝑉𝐿= 𝐿𝑎 𝑑𝑖𝑎 (𝑡)/dt. Armature current = 𝑖𝑎 (t). The  Formula 𝑉𝑏 = 𝑏ack e. 𝑚. 𝑓 yields as 𝐾𝑏 𝜔 (t). Where Kb  is the velocity constant and ω (t) is the angular or  rotational speed*.*  (2)  For Mechanical part, the torques must add up to zero in  order for the system to be energy balanced. Therefore,  (3)  where 𝑇*L* = load torque and 𝑇𝑒 = electromagnetic torque.  The rotor's rotational acceleration torque is represented by  𝑇𝜔′, while the motor's velocity damping torque is represented  by 𝑇𝜔.Given that the strength of the magnetic field is  constant[7, 8]: |
| --- |

(4)

where 𝐾𝑡 is the torque constant, and

(5)

Where 𝐽 = inertia of the rotor and equivalent load.Also,

(6)

Where B is the damping coefficient associated with rotation of motor.

When (4), (5), and (6) are entered into (3), we obtain that:

(7)

The armature current differential equation (𝑖𝑎 (t)) and the angular velocity differential equation (𝜔 (t)) can be expressed as [7]:

(8)

(9)

Similarly, the transfer function of the DC motor in terms of rotational speed and torque and applied voltage can be obtained by taking the Laplace transform. The mathematical model can be presented in MATLAB Simulink in the figure 2 [9, 10]:


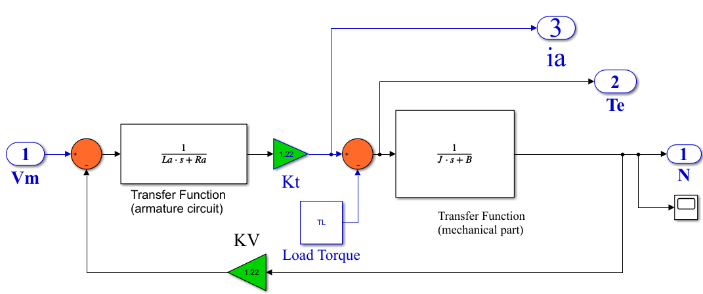


Figure 2. Block Diagram Representation of the PMDC Motor[10].

# SPEED CONTROL OF PMDC MOTOR

In numerous industrial processes and motor control applications, traditional Proportional-Integral-Derivative (PID) controllers have been widely employed as a control strategy. However, the commonly used trial-and-error approach for tuning the controller's parameters is both time-intensive and labor-demanding. Despite the simplicity and reliability of the PID control method, optimizing the controller's gain continues to present significant challenges [7]. The structure of the PID controller is illustrated in Figure 3 [9].


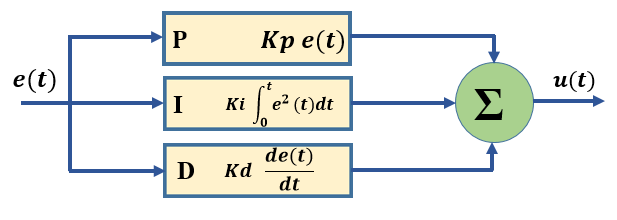


Figure 3. Traditional PID Controller [9].

(10)

The control signal u (t) represents the time-dependent error signal or the control output. The input signal of a PID controller, e(t), is also known as the error signal, as it is used to determine how much deviation exists between the desired data input and actual output value. The full impact of each controller parameter (*kp,ki,kd*) on a typical closed-loop system is crucial to achieving optimal voltage regulation. In this study, tuning these parameters is a key focus on enhancing the speed control performance of PMDC motors, ensuring improved dynamic response and stability[11, 12].

This study employs the trial-and-error method to tune the parameters of the conventional controller during the initial test, focusing on regulating the motor's speed by adjusting the input voltage.

# SIMULATION OF THE SYSTEM

The model of PMDC Motor figure 2.without controller as shown in figure 4. The simulation begins by analyzing the response of the Permanent Magnet DC (PMDC) motor without applying a PID controller. This step is essential to understand the motor's natural behavior under an open-loop configuration. The motor exhibits overshoot, steady-state error, and sluggish transient response without any control mechanism. These issues arise due to the lack of feedback regulation, causing the engine to fail to achieve the desired speed or position accurately and within a reasonable time. By observing the motor's response in this uncontrolled state, we can identify its dynamic characteristics and performance limitations, which will later serve as a baseline for evaluating the improvements introduced by the PID controller. The graphical results, such as speed and torque curves, are presented below to illustrate this behavior.

Table 1. Parameter Specifications for the Proposed Motors [5]

| **Motor Parameters** | **Symbol** | **Value** | **Unit** |
| --- | --- | --- | --- |
| Armature resistance | Ra | 11.2 | Ω |
| Armature inductance | La | 0.1215 | H |
| Armature voltage | Va | 240 | V |
| Rotor inertia | J | 0.02215 | kg.m^2 |
| Friction coefficient | B | 0.002953 | N.m.s/rad |
| B.E.M.F constant | ke | 1.28 | V.Sec/rad |
| Load torque | TL | 10 | N.m |
| desired speed | N | 1500 | rpm |


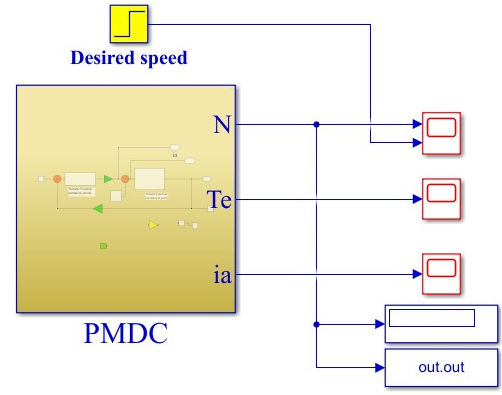


Figure 4. Uncontrolled PMDC Motor Modleing.

Figure 5.show the desired, and output speed (rad/sec)

of PMDC motor:


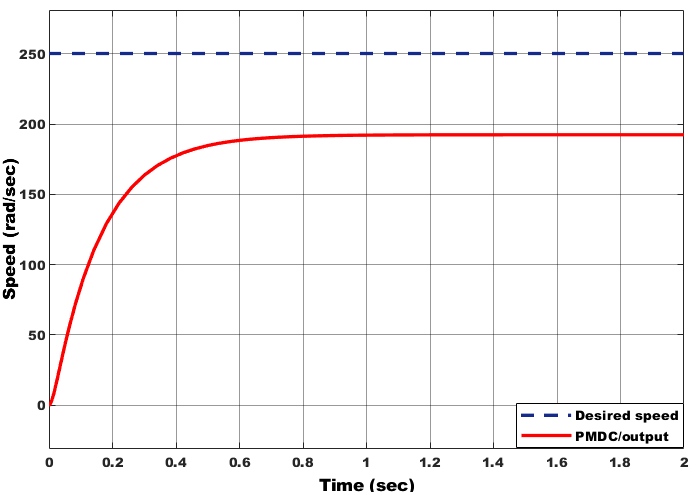


Figure 5. Uncontrolled PMDC Motor Speed Response.


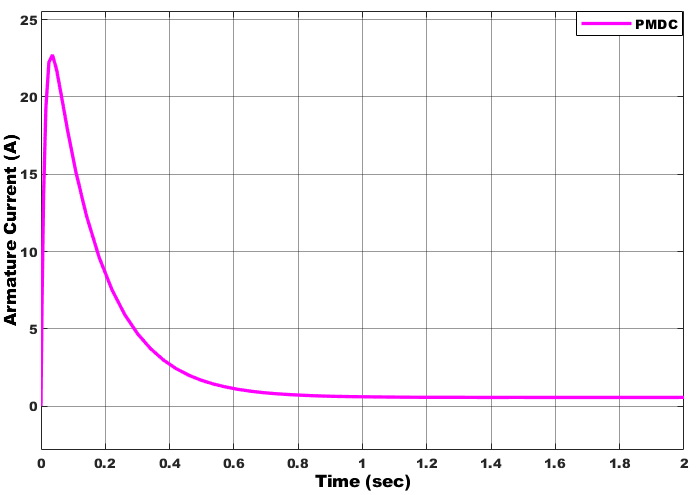


Figure 6. Uncontrolled PMDC Armature current Response.


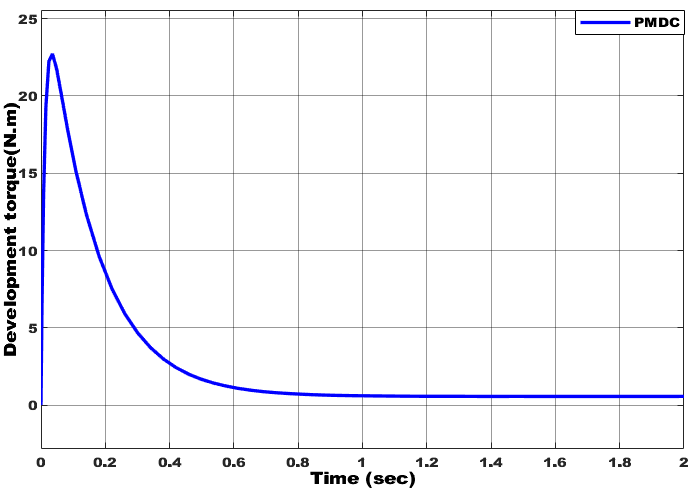


Figure 7. Uncontrolled PMDC Motor Development Torque Response.

According to the simulation results, without a control system, the PMDC motor was unable to reach the target speed of 250 rad/s (1500 rpm). Instead, the steady-state speed of the motor stabilized at 192.4 rad/s (approximately 1154 rpm). This deviation demonstrates the motor's open-loop functioning limits, which include internal losses, external disturbances, and a lack of feedback regulation that keeps it from performing at the desired level. Furthermore, as is seen in this case, steady-state error is exacerbated by the lack of control. These results emphasize the need for a feedback-based control system to reduce steady-state error, improve the transient response, and ensure accurate speed regulation. To address these shortcomings, a (PID) controller is presented. Known for its effectiveness in enhancing system dynamics, the PID controller continuously adjusts the motor inputs based on the error between the desired performance and the actual performance. Figure 8. shows the model of PMDC with PID controller.


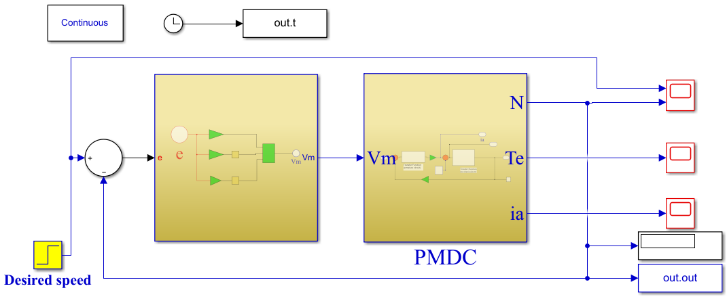


Figure 8. Controlled PMDC Motor Model.

Figure 9 shows the desired and output speed (rad/sec) of the PMDC motor when the motor is controlled.


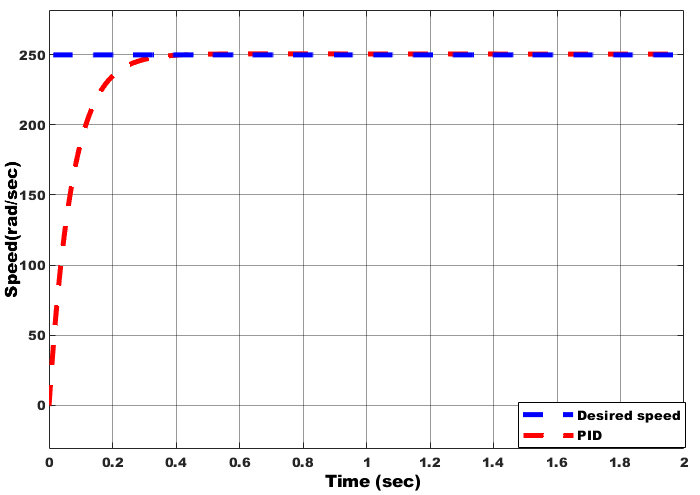


Figure 9. The desired and output speed (rad/sec) of the PMDC motor.

With a speed of 250.5 rad/s (1503rpm), the PID controller surpassed the target speed of 250 rad/s (1500rpm) by 0.5 rad/s or around 3 rpm. Figure 10. Shows that armature current.


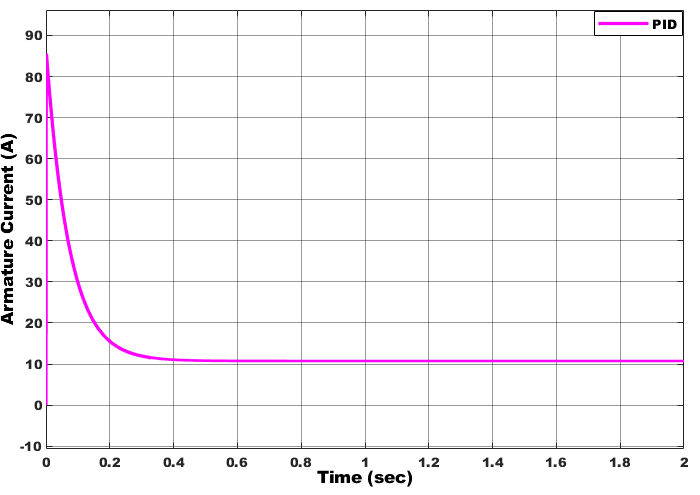


Figure 10. Controlled PMDC Armature current Response.

Figure 11. Shows that torque development in this motor.


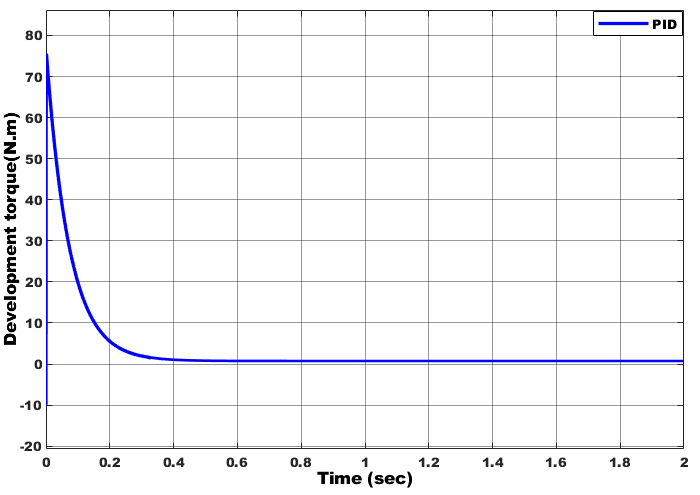


Figure 11. Controlled PMDC Motor Development Torque Response.

In comparison to the open-loop system, the motor's speed, current, and torque performance greatly improved with the use of the conventional PID control system. The torque and current are increased by about 96%, according to the results, indicating how well the PID controller stabilizes the motor's operation. The controller also contributed to a more accurate and consistent speed response, which lessened oscillations and made sure the motor ran closer to the intended parameters. These enhancements demonstrate how important feedback-based control is for maximizing motor performance.

Table 2: Parameters for PID Controller

| **Algorithm** | **KP** | **KI** | **KD** |
| --- | --- | --- | --- |
| PID | 100 | 27 | 7 |

Table 3 .performance values of the PIDController.

| **Algorithm** | **Rise time(sec)** | **Overshoot**  **%** | **Settling time (sec)** | **MP(rpm)** |
| --- | --- | --- | --- | --- |
| PID | 0.1585 | 0.0824 | 0.2804 | 3 |

# SIMULATION OF ON- LINE NEURAL NETWORK.

Online Neural Networks (NNs) are used to modify the parameters of input and output. Back propagation (BP) learning networks are one method used to train this. Simulations and experiment findings demonstrate that the suggested controller is dependable and efficient in controlling PMDC speed[11].As seen in Figure 12, the suggested controller regulates speed using a PID neural controller.


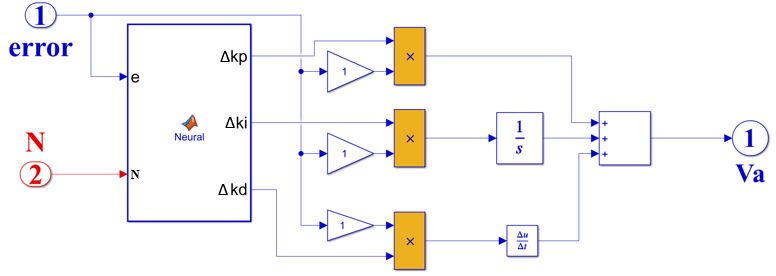


Figure 12. A neural-PID controller is constructed using a MATLAB model.

The neural network structure of the controller consists of two input neurons, representing error (e) and speed (N). Figure 13 illustrates the variations in the PID controller’s parameter gains, along with three output neurons, five hidden neurons, and additional components. The system utilizes a direct input-output network, hidden layers, and multiple nodes, which resemble the structure of an Artificial Neural Network (ANN) algorithm. ANN is particularly effective in processing binary data and offers higher accuracy compared to traditional methods. The application of these techniques in electrical and electronic engineering consistently meets the required standards.

Due to their high speed, low maintenance, and sufficient torque capabilities, PMDC motors are widely used in various applications. The speed of PMDC motors can be controlled by adjusting the DC input voltage to the PID controller, which powers the motor winding. The PID controller, designed in MATLAB (R2020a), facilitates motor speed control. A neural network processes the data collected, enabling the ANN model to make precise predictions about the related parameters. Both data-driven predictions and mathematical simulations yield favorable results[13].


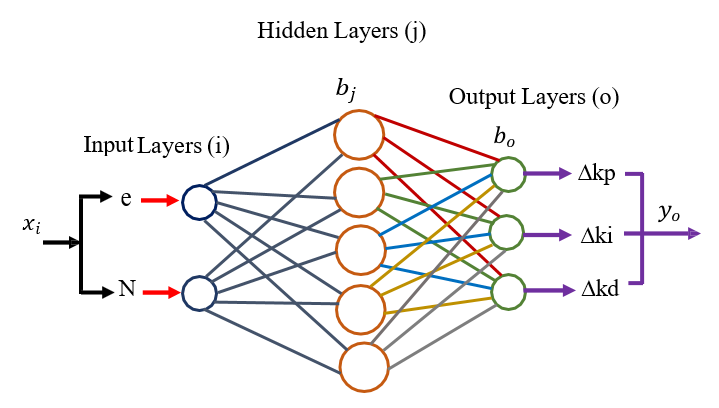


Figure 13. Structure of NN [14]:

The controller in question is capable of identifying the following inputs and outputs:

(11)

Where,

The input vector 𝑋𝑖 corresponds to the input vector of the controller for neural networks.

The output vector of the neural network controller, denoted by 𝑦o, is a key component in ensuring the overall operational effectiveness of the system. The following formulas can be used to calculate the mathematical expression that defines the neural network [10], according to scientific conventions. The output vector of the neural network controller, denoted by 𝑦o, is critical to ensuring the overall operational effectiveness of the system. According to academic standards and conventions, the mathematical equation that defines the neural network [10] can be calculated using the following formulas.

(12)

(13)

(14)

(15)

Where,

: The weight ratio among hidden neurons and input neurons. The output of the hidden layers is presented as demonstrated. The result (output) of NN is. : is the ratio of the hidden neurons weight to the output. : The hidden layers' bias. : Its output layer establishes its bias. 𝑘 is the current training regimen and represents the total number of training sets.

The parameters of neural networks are as follows:
The weights that are inside the hidden layer are:

Weights of output layers:

The weights resulting from the training of the neural network are used to improve the performance of the PID controller. These weights are implemented using a structure based on the back-propagation learning algorithm (Figure 12). By integrating the PID controller with the neural network, a system is created to refine and improve speed control. The main goal of this study is to improve and develop the proposed speed control mechanism presented in this research. MATLAB simulation is used to design the neural network, where the speed error is input to the network and the optimized controller parameters are produced as output. These parameters are then used to effectively regulate the motor input voltage. The architecture of the proposed neural network is illustrated in Figure 14 [6].


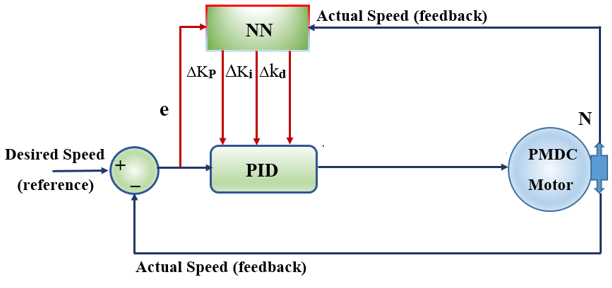


Figure 14. Block schematic of a PMDC motor by a neural network [6].

The response model of the artificial neural network method utilized in this study's MATLAB R2020a simulation is displayed in Figure15.


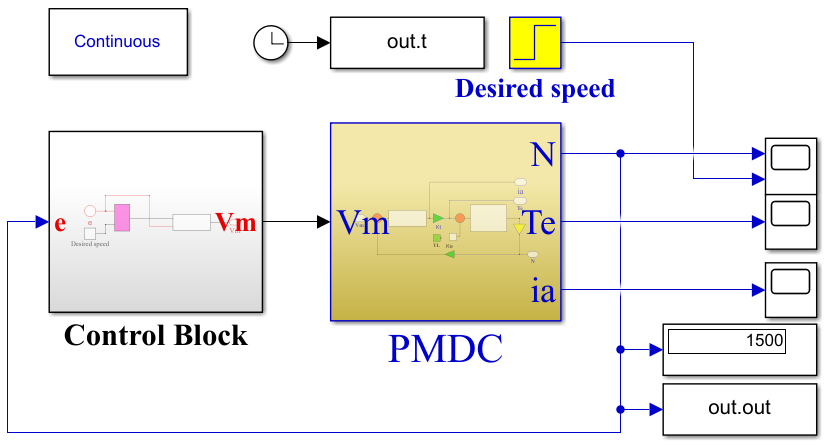


Figure 15. Block diagram for the PMDC motor’s overall modeling.

Figure 16 shows the speed response of the PMDC motor.


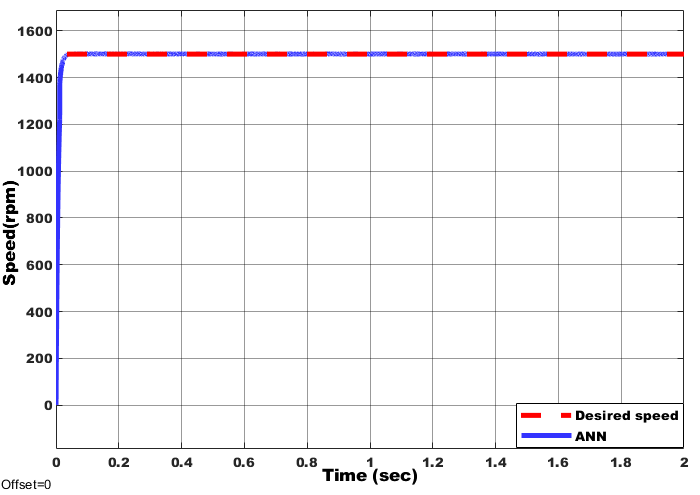


Figure 16. speed response of the PMDC motor-ANN-PID-Controller.

Figures 17-18 . show that armature current ,and development toruqe.


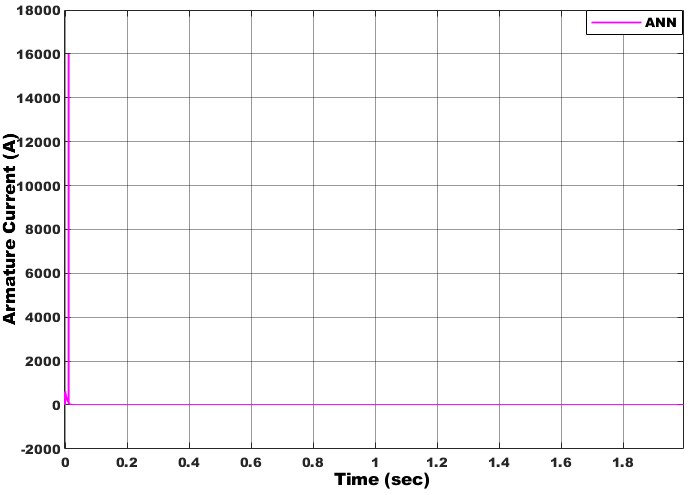


Figure 17. Armature current response of the PMDC motor-ANN-PID-Controller.


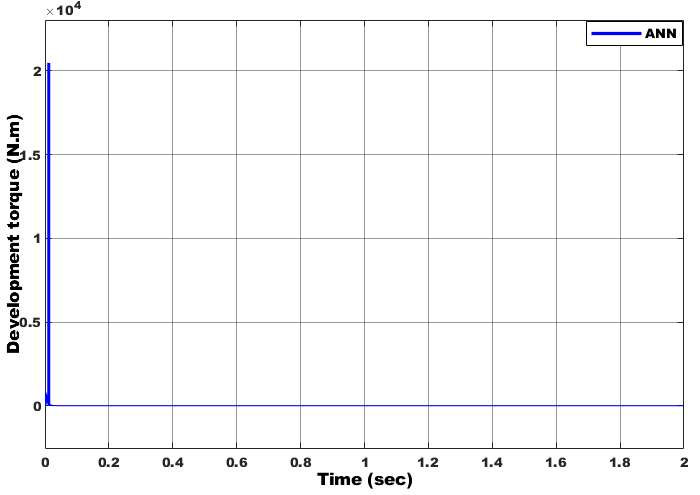


Figure 18. Development torque response of the PMDC motor-ANN-PID-Cotroller

The speed and current performance of the online neural network were 100% better than those of the conventional PID controller. According to table 4:

Table 4.The prefermance of ANN

| **Algorithm** | **Rise time(sec)** | **Overshoot**  **%** | **Settling time (sec)** | **MP**  **(rpm)** |
| --- | --- | --- | --- | --- |
| ANN | 0.0110 | 0.0660 | 0.0218 | 0.0011 |

Figure 19. show the prefarmance of PID-ANN.


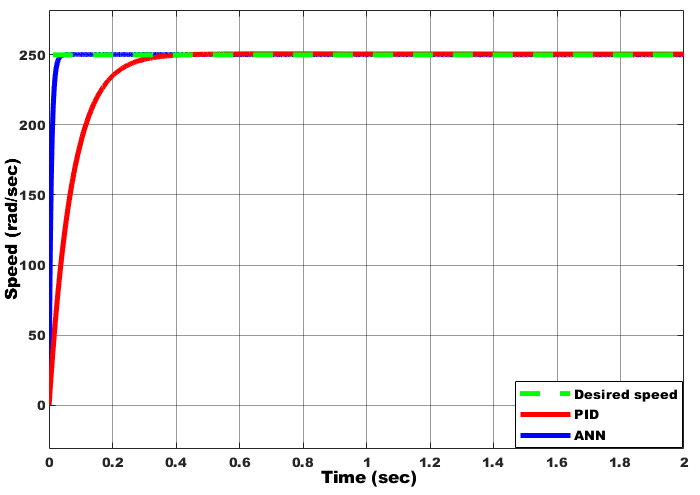


Figure 19. Speed response of the motor using (1) PID, (2) ANN-PID .

Table 5.show the prefermance of PID ,and ANN-PID.

Table 5. Performance characteristics of motor speed.

| **Algorithm** | **Rise time(sec)** | **Overshoot**  **%** | **Settling time (sec)** | **MP**  **(rpm)** |
| --- | --- | --- | --- | --- |
| PID | 0.1585 | 0.0824 | 0.2804 | 3 |
| ANN-PID | 0.0110 | 0.0660 | 0.0218 | 0.0011 |

# Conclusion

To effectively control the speed of the PMDC motor, a detailed analysis of an advanced simulation model is carried out in this work. Two types of controllers are examined: the (PID) controller and a hybrid controller that combines online neural network technology with PID control. The latter demonstrated superior performance compared with the DC motor, achieving a highly responsive system and maintaining torque profiles more efficiently than the traditional PID controller. Furthermore, the motor speed remained stable and consistent when using the neural network-enhanced PID controller, which is a highly desirable feature. During testing, the system’s response is found to be excellent, confirming the effectiveness of this advanced approach. The achieved results highlight the capability of neural network-based PID controllers to regulate the speed of PMDC- motors more effectively than traditional methods.

References

[1] P. Dhinakaran and D. Manamalli, "Novel strategies in the Model-based Optimization and Control of Permanent Magnet DC motors," *Computers & Electrical Engineering,* vol. 44, pp. 34-41, 2015, doi: <http://dx.doi.org/10.1016/j.compeleceng.2015.04.002>.

[2] M. Charles, D. Oku, F. Faithpraise, and E. Obot, "Simulation and control of PMDC motor current and torque," *International Journal of Advanced Scientific and Technical Research,* vol. 7, no. 5, pp. 367-375, 2015.

[3] M. Homaeinezhad and M. Farzannasab, "Switching position-torque control system for increasing servo PMDC positioning precision in presence of intense external disturbance loading," *Mechanical Systems and Signal Processing,* vol. 158, p. 107816, 2021, doi: <https://doi.org/10.1016/j.ymssp.2021.107816>.

[4] A. Alkamachi, "Permanent magnet DC motor (PMDC) model identification and controller design," *Journal of Electrical Engineering,* vol. 70, no. 4, pp. 303-309, 2019, doi: <https://doi.org/10.2478/jee-2019>–0060

[5] V. Sankardoss and P. Geethanjali, "PMDC motor parameter estimation using bio-inspired optimization algorithms," *IEEE Access,* vol. 5, pp. 11244-11254, 2017, doi: <https://doi.org/10.1109/ACCESS.2017.2679743>.

[6] H. J. Ali, H. D. Almukhtar, and D. K. Shary, "Speed Control of Brushless DC Motor based on Online Neural-PID Controller," in *Proceedings of the Cognitive Models and Artificial Intelligence Conference*, 2024, pp. 67-74, doi: <https://doi.org/10.1145/3660853.3660869>.

[7] M. Charles, R. Okoro, I. Ikposhi, and D. Oku, "Reliable control of pmdc motor speed using matlab," *International Journal of Scientific & Engineering Research,* vol. 6, no. 12, pp. 208-216, 2015.

[8] H. J. N. Diyah Kammel Shary1 "Position and Speed Control for Permanent Magnet DC Motor Based on Different Diyah Kammel Shary1 , Habeeb J. Nekad2Optimization Algorithms," *Journal Européen des Systèmes Automatisés,* vol. Vol. 57, No. 6, December, 2024, , pp. pp. 1705-1711, 2024, doi: <https://doi.org/10.18280/jesa.570618>.

[9] E. Gowthaman and C. D. Balaji, "Self tuned PID based speed control of PMDC drive," in *2013 International Mutli-Conference on Automation, Computing, Communication, Control and Compressed Sensing (iMac4s)*, 2013: IEEE, pp. 686-692.

[10] S. S. Sami, Z. A. Obaid, M. T. Muhssin, and A. N. Hussain, "Detailed modelling and simulation of different DC motor types for research and educational purposes," *International Journal of Power Electronics and Drive Systems (IJPEDS),* vol. 12, no. 2, pp. 703-714, 2021, doi: <https://doi.org/10.11591/ijpeds.v12.i2.pp703-714>.

[11] F. Hassan, W. Fayek, H. Seoudy, and A. Kamel, "Speed Regulation of Brushless DC Drives Using Optimized Fuzzy Logic Controller," in *International Conference on Aerospace Sciences and Aviation Technology*, 2013, vol. 15, no. AEROSPACE SCIENCES & AVIATION TECHNOLOGY, ASAT-15–May 28-30, 2013: The Military Technical College, pp. 1-13.

[12] H. J. Nekad, D. K. Shary, and M. A. Alawan, "Position Control of Linear Synchronous Reluctance Motor Using a Modified Camel Traveling Algorithm-Based Proportional Integral Controller," *Mathematical Modelling of Engineering Problems,* vol. 11, no. 6, 2024, doi: <https://doi.org/10.18280/mmep.110619>.

[13] T.-Y. Ho, Y.-J. Chen, P.-H. Chen, and P.-C. Hu, "The design of a motor drive based on neural network," in *2017 International Conference on Applied System Innovation (ICASI)*, 2017: IEEE, pp. 337-340, doi: <https://doi.org/10.1109/icasi.2017.7988421>.

[14] A. Abdulhasan, R. Thejel, and D. Shary, "Position Control of the Surface Motor Based on Artificial Neural Network," in *Proceedings of 2nd International Multi-Disciplinary Conference Theme: Integrated Sciences and Technologies, IMDC-IST 2021, 7-9 September 2021, Sakarya, Turkey*, 2022, doi: <https://doi.org/10.4108/eai.7-9-2021.2314778>.

1. [↑](#footnote-ref-1)
